# Supplementary material for: Engineered transfer RNAs for suppression of premature termination codons
Source: PubMed Central journal article supplement (PMC6379413; doi:10.1038/s41467-019-08329-4), 2019-02-18
Supplement: 41467_2019_8329_MOESM1_ESM.pdf [file 41467_2019_8329_MOESM1_ESM.pdf]

Engineered transfer RNAs for suppression of premature termination codons.

Lueck et al

| Amino Acid |     |               | Codons |     |     |     |     |     |
|------------|-----|---------------|--------|-----|-----|-----|-----|-----|
| W          | Trp | Tryptophan    | TGG    |     |     |     |     |     |
| Y          | Tyr | Tyrosine      | TAC    | TAT |     |     |     |     |
| C          | Cys | Cysteine      | TGC    | TGT |     |     |     |     |
| E          | Glu | Glutamic acid | GAA    | GAG |     |     |     |     |
| K          | Lys | Lysine        | AAA    | AAG |     |     |     |     |
| Q          | Gln | Glutamine     | CAA    | CAG |     |     |     |     |
| S          | Ser | Serine        | AGC    | AGT | TCA | TCC | TCG | TCT |
| L          | Leu | Leucine       | TTA    | TTG | CTA | CTC | CTG | CTT |
| R          | Arg | Arginine      | AGA    | AGG | CGA | CGC | CGG | CGT |
| G          | Gly | Glycine       | GGA    | GGC | GGG | GGT |     |     |
| F          | Phe | Phenylalanine | TTC    | TTT |     |     |     |     |
| D          | Asp | Aspartic acid | GAC    | GAT |     |     |     |     |
| H          | His | Histidine     | CAC    | CAT |     |     |     |     |
| N          | Asn | Asparagine    | AAC    | AAT |     |     |     |     |
| M          | Met | Methionine    | ATG    |     |     |     |     |     |
| A          | Ala | Alanine       | GCA    | GCC | GCG | GCT |     |     |
| P          | Pro | Proline       | CCA    | CCC | CCG | CCT |     |     |
| T          | Thr | Threonine     | ACA    | ACC | ACG | ACT |     |     |
| V          | Val | Valine        | GTA    | GTC | GTG | GTT |     |     |
| I          | Ile | Isoleucine    | ATA    | ATC | ATT |     |     |     |
| X          | STP | Stop codon    | TAA    | TAG | TGA |     |     |     |

**Codon usage for common PTC.** Red highlight indicates the most common codons and corresponding amino acid type which can be converted to stop codons by a single nucleotide substitution. Engineered tRNAs have been developed for each type.

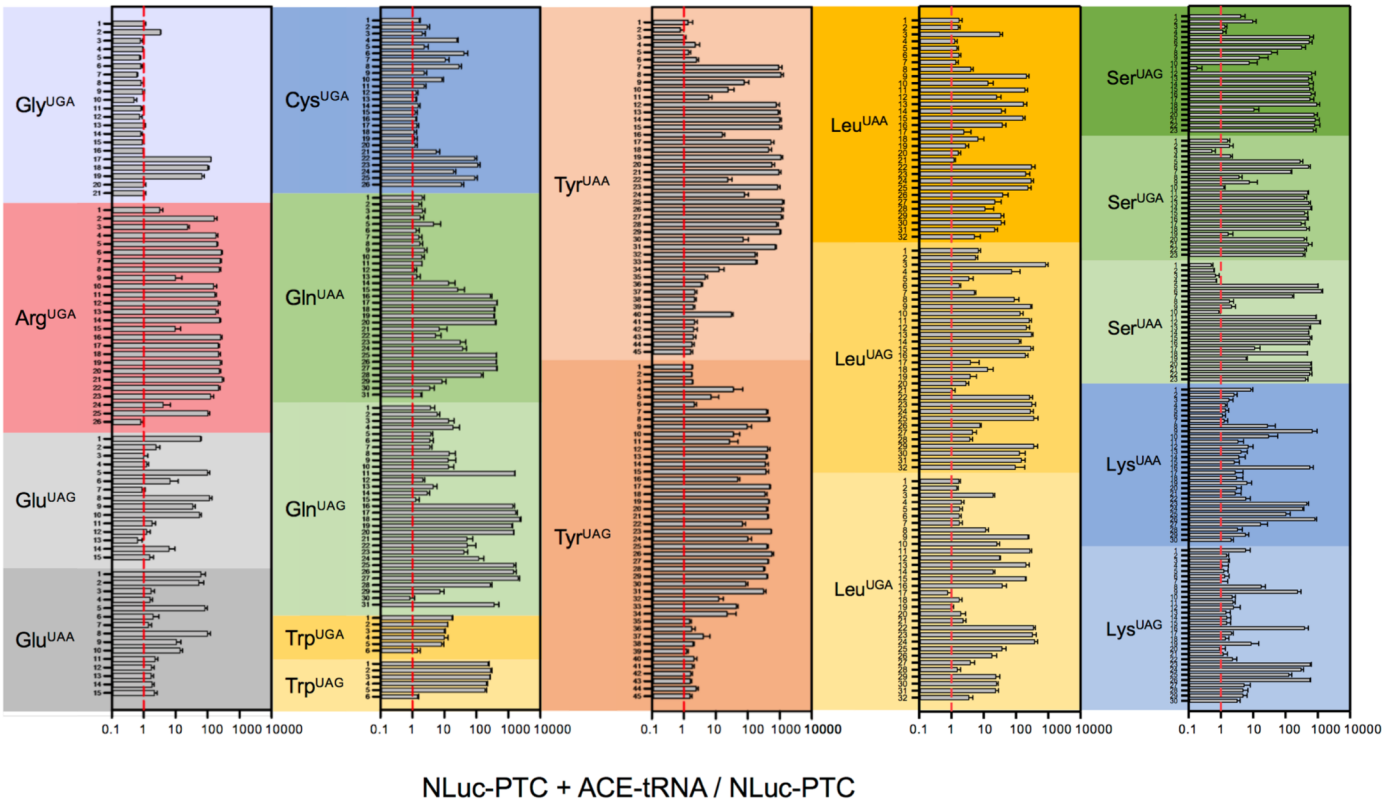

Number referenced ACE-tRNA activity plot.



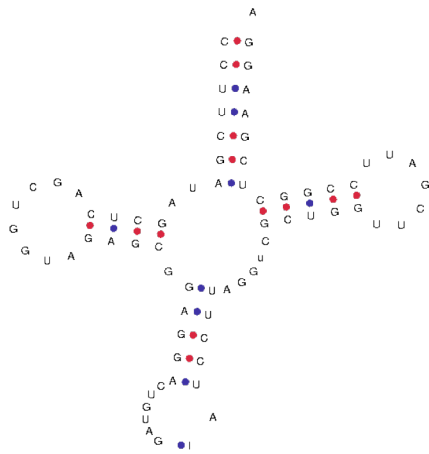

Tyr-chr14.trna17  
UAA not UAG

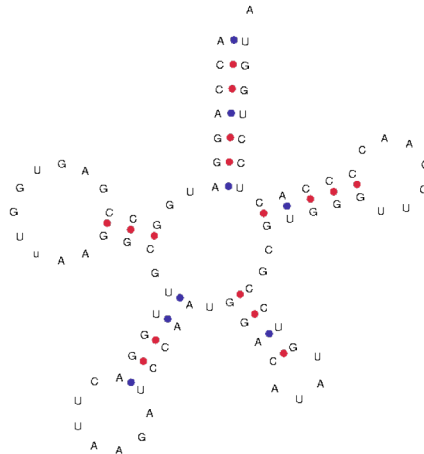

Leu-chr6.trna81  
UGA and UAA, not UAG

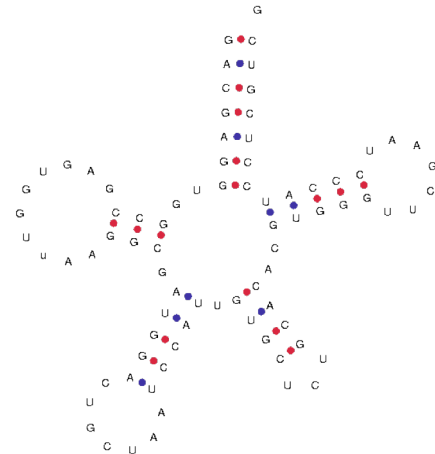

Ser-chr6.trna61

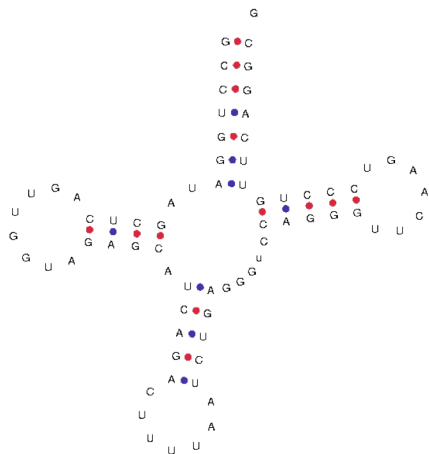

Lys-chr11.trna11  
UAG not UAA

**Predicted cloverleaf structures for ACE-tRNA examples used in this study.** Anticodon type noted for versions that were functional for suppression. Cloverleaf predictions were based off the parent sequence (non-mutated) of each ACE-tRNA using tRNAscan-SE (<http://lowelab.ucsc.edu/tRNAscan-SE/>).



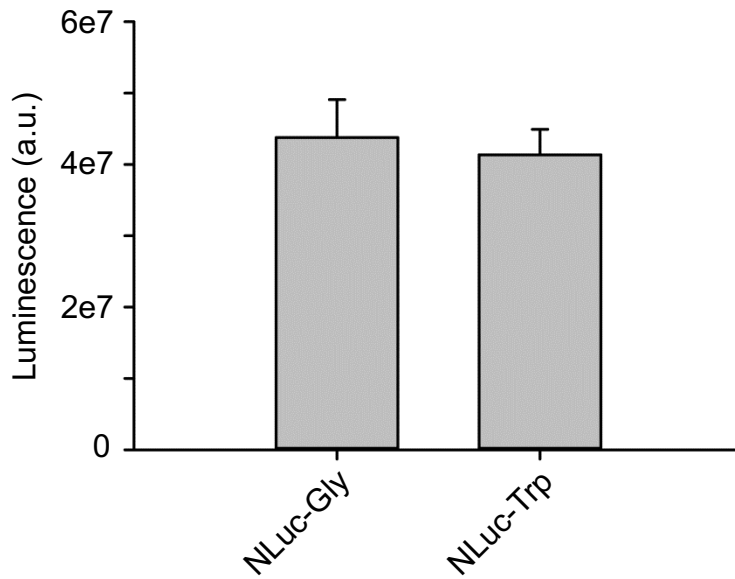

Side-chain identity at p.162 in Nanoluciferase does not effect activity. Total luminescence activity is indicated for each mutation at site.

**a**

```

TrpChr17.tRNA39          >>>>>>. .>>>>. . . . . <<<<. >>>>>>. . . . . <<<<<<<<<<<.
TrpChr17.tRNA10          -GACCUCUGGGCGCAACGGCAGCGGUCUGACUucag-----AUCAGAAGGUUGCGGUUCAAAUACAGUCGGGGUCA
TrpChr6.tRNA171         -GACCUCUGGGCGCAACGGUAGCGGUCUGACUccag-----AUCAGAAGGUUGCGGUUCAAAUACAGUCGGGGUCA
TrpChr12.tRNA6          -GACCUCUGGGCGCAACGGUAGCGGUCUGACUucag-----AUCAGAAGGUUGCGGUUCAAAUACAGUCGGGGUCA
TrpChr7.tRNA3           -GACCUCUGGGCGCAACGGUAGCGGUCUGACUucag-----AUCAGAAGGUUGCGGUUCAAAUACAGUCGGGGUCA
TrpChr7.tRNA31         -GACCUCUGGGCGCAACGGUAGCGGUCUGACUucag-----AUCAGAAGGUUGCGGUUCAAAUACAGUCGGGGUCA

Mus_musculuschr11.tRNA817 -GACCUCUGGGCGCAAUGGUAGCGGUCUGACUucag-----AUCAGAAGGUUGCGGUUCAAAUACAGUCGGGGUCA
Mus_musculuschr10.tRNA567 -GACCUCUGGGCGCAAUGGUAGCGGUCUGACUucag-----AUCAGAAGGUUGCGGUUCAAAUACAGUCGGGGUCA
Saccharomyces_cerevisiaechrVII.tRNA333 -GAAGCGGGCGCAACGGUAGCGGUCUGACUucag-----AUCAGAAGGUUGCGGUUCAAAUACAGUCGGGGUCA
Saccharomyces_cerevisiaechrVII.tRNA333 -GAAGCGGGCGCAACGGUAGCGGUCUGACUucag-----AUCAGAAGGUUGCGGUUCAAAUACAGUCGGGGUCA
Pan_troglodyteschr7.tRNA28 -GACCUCUGGGCGCAAUGGUAGCGGUCUGACUucag-----AUCAGAAGGUUGCGGUUCAAAUACAGUCGGGGUCA
Oryctolagus_cuniculuschrUn0422.tRNA1 -GACCUCUGGGCGCAAUGGUAGCGGUCUGACUucag-----AUCAGAAGGUUGCGGUUCAAAUACAGUCGGGGUCA
Oryctolagus_cuniculus_chrUn0563.tRNA1 -GACCUCUGGGCGCAAUGGUAGCGGUCUGACUucag-----AUCAGAAGGUUGCGGUUCAAAUACAGUCGGGGUCA
Oryctolagus_cuniculus_chrUn062.tRNA12 -GACCUCUGGGCGCAAUGGUAGCGGUCUGACUucag-----AUCAGAAGGUUGCGGUUCAAAUACAGUCGGGGUCA
Rattus_norvegicus_chr13.tRNA4571 -GACCUCUGGGCGCAAUGGUAGCGGUCUGACUucag-----AUCAGAAGGUUGCGGUUCAAAUACAGUCGGGGUCA
Rattus_norvegicus_chr17.tRNA3948 -GACCUCUGGGCGCAAUGGUAGCGGUCUGACUucag-----AUCAGAAGGUUGCGGUUCAAAUACAGUCGGGGUCA
Xenopus_tropicalis_tRNA-trp-cca-10-1 -GACCUCUGGGCGCAACGGCAGCGGUCUGACUccag-----AUCAGAAGGUUGCGGUUCAAAUACAGUCGGGGUCA
Xenopus_tropicalis_tRNA-trp-cca-11-1 -GACCUCUGGGCGCAACGGCAGCGGUCUGACUccag-----AUCAGAAGGUUGCGGUUCAAAUACAGUCGGGGUCA
Xenopus_tropicalis_tRNA-trp-cca-12-1 -GACCUCUGGGCGCAACGGCAGCGGUCUGACUccag-----AUCAGAAGGUUGCGGUUCAAAUACAGUCGGGGUCA
Xenopus_tropicalis_tRNA-trp-cca-13-1 -GACCUCUGGGCGCAACGGCAGCGGUCUGACUccag-----AUCAGAAGGUUGCGGUUCAAAUACAGUCGGGGUCA
Xenopus_tropicalis_tRNA-trp-cca-3-1 -GACCUCUGGGCGCAACGGCAGCGGUCUGACUccag-----AUCAGAAGGUUGCGGUUCAAAUACAGUCGGGGUCA
Xenopus_tropicalis_tRNA-trp-cca-5-1 -AGGGUAUActucaAUUGGUCAGAGCGGUCguucaA-accgAAGGUUGagGUUCAaaUccUacUgCCccUgCCA
Xenopus_tropicalis_tRNA-trp-cca-6-1 -GACCUCUGGGCGCAACGGCAGCGGUCUGACUccag-----AUCAGAAGGUUGCGGUUCAAAUACAGUCGGGGUCA
Xenopus_tropicalis_tRNA-trp-cca-7-1 -GACCUCUGGGCGCAACGGCAGCGGUCUGACUccag-----AUCAGAAGGUUGCGGUUCAAAUACAGUCGGGGUCA
Xenopus_tropicalis_tRNA-trp-cca-8-1 -ACGGAGUActucaAGUUGGUAgcACccCGguucaA-accgGguUgGUUCAaaUccUacUgCCccUg
Xenopus_tropicalis_tRNA-trp-cca-9-1 -GACCUCUGGGCGCAACGGCAGCGGUCUGACUccag-----AUCAGAAGGUUGCGGUUCAAAUACAGUCGGGGUCA
D_melanogaster_tRNA-trp-cca-2-1 -GACUccgGGCGCAACGGUAGCGGUCcaucag-----AUCAGAAGGUUGCGGUUCAAAUACAGUCGGGGUCA
D_melanogaster_tRNA-trp-cca-1-1 -GACUccgGGCGCAACGGUAGCGGUCcaucag-----AUCAGAAGGUUGCGGUUCAAAUACAGUCGGGGUCA

TrpChr7.tRNA3-WT        -GGCCUCUGGGCGCAACGGUAGCGGUCUGACUccag-----AUCAGAAGGUUGCGGUUCAAAUACAGUCGGGGUCA
TrpChr7.tRNA3-Hirsch-CCA -GGCCUCUGGGCGCAACGGUAGCGGUCUGACUccag-----AUCAGAAGGUUGCGGUUCAAAUACAGUCGGGGUCA
TrpChr7.tRNA3-Hirsch-G9C-CCA -GGCCUCUGGGCGCAACGGUAGCGGUCUGACUccag-----AUCAGAAGGUUGCGGUUCAAAUACAGUCGGGGUCA
TrpChr7.tRNA3-Hirsch-UCA -GGCCUCUGGGCGCAACGGUAGCGGUCUGACUccag-----AUCAGAAGGUUGCGGUUCAAAUACAGUCGGGGUCA
TrpChr7.tRNA3-G9C-UCA -GGCCUCUGGGCGCAACGGUAGCGGUCUGACUccag-----AUCAGAAGGUUGCGGUUCAAAUACAGUCGGGGUCA
TrpChr7.tRNA3-Hirsch-G9C-UCA -GGCCUCUGGGCGCAACGGUAGCGGUCUGACUccag-----AUCAGAAGGUUGCGGUUCAAAUACAGUCGGGGUCA

```

**b**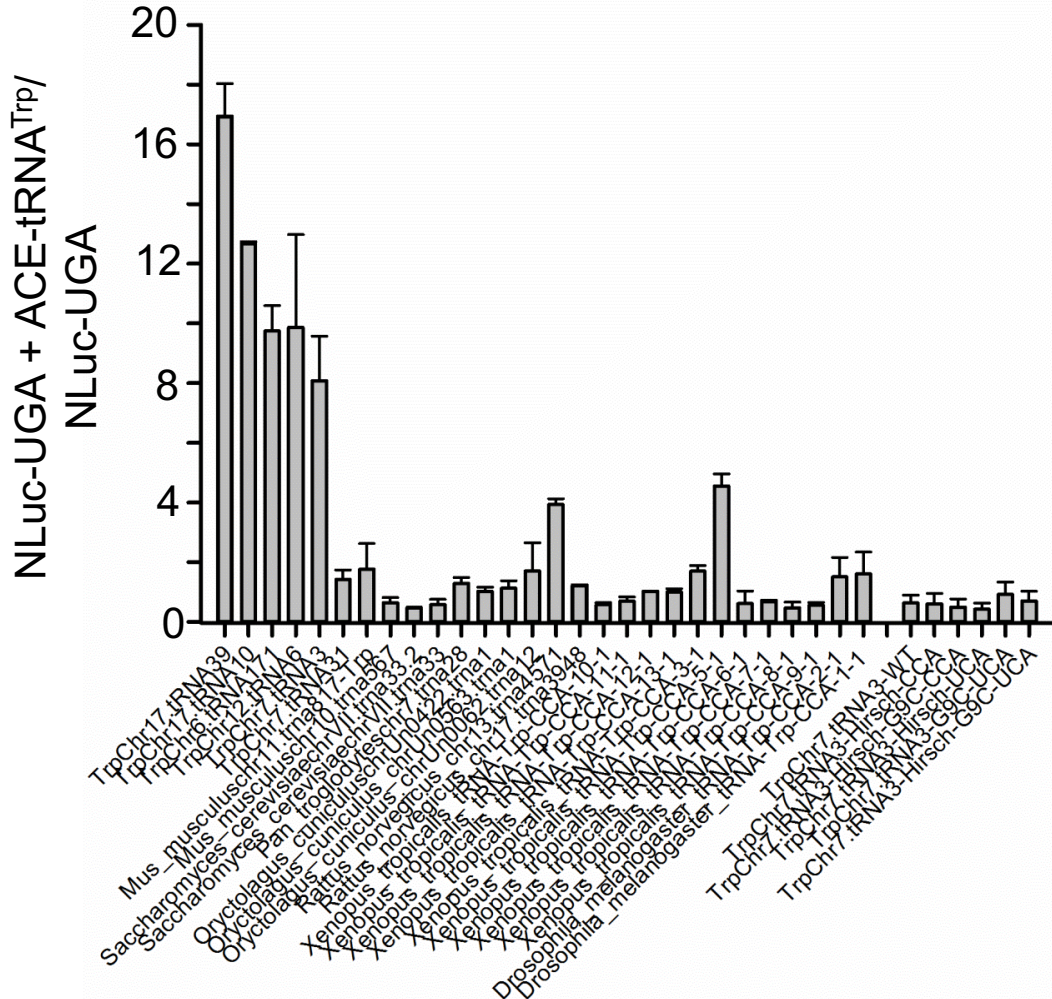

**Analysis of ACE-tRNA<sup>Trp</sup> sequences from multiple species and suppressor tRNA mutations.**  
 Supplementary Fig. 5



**a**

MSFNTIIIDWNSCTAEQQRQLLMRPAISASESITRTVNDILDNV  
KARGDEALREYSAKFDKTTVTALKVSAEEIAAASERLSDELKQ  
AMAVAVK**NIETFHTA**QKLPPVDVETQPGVRCQQVTRPVASVGL  
YIPGGSAPLFFSTVLMLATPASIAGCKKVVLCSPPIADEILYA  
AQLCGVQDVFENVGGAQAIAALAFGTESVPKVDKIFGPGNAFVT  
EAKRQVSQRLDGAAIDMPAGPSEVLVIADSGATPDFVASDLLS  
QAEHGPDSQVILLTPAADMARRVAEAEVERQLAELPRAETARQA  
LNASRLIVTKDLAQCVEISNQYGPEHLIIQTRNARELVDSITS  
AGSVFLGDWSPESAGDYASGTNHVLPITYGYTATCSSLGLADFQ  
KRMTVQELSKEGFSALASTIETLAAAERLTAHKNVTLRVNAL  
KEQAHHHHHHHSGGSAWSHPQFEK

**b**HDH N94tga + ACE-tRNA<sub>Trp</sub>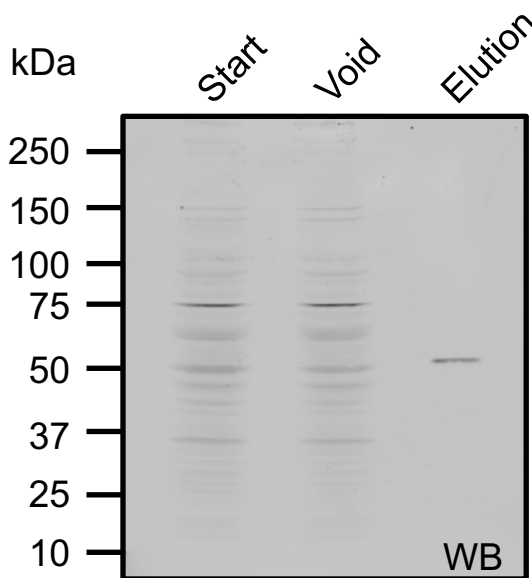**c**HDH N94tga + ACE-tRNA<sub>Gly</sub>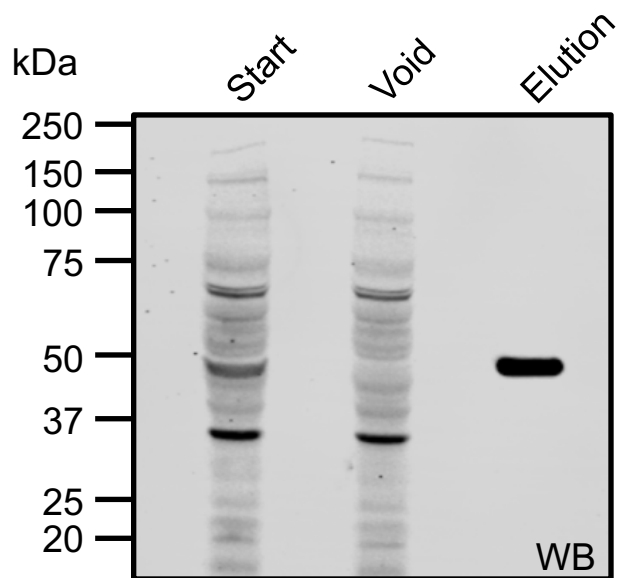

**Histidinol dehydrogenase (HDH) His(8)-streptactin expression construct allows for efficient one-step isolation of protein from HEK293 cells. a)** Protein sequence of HDH expression construct.

Underlined sequence indicates coverage by mass spectrometry. The red asparagine (a.a. position 94) is the residue mutated to a TGA PTC for determining ACE-tRNA fidelity. The dual affinity tag is indicated in green. Silver stain of HDH protein following PTC suppression with **b)**

Trpch17.trna39 and **c)** Glychr19.trna2 .

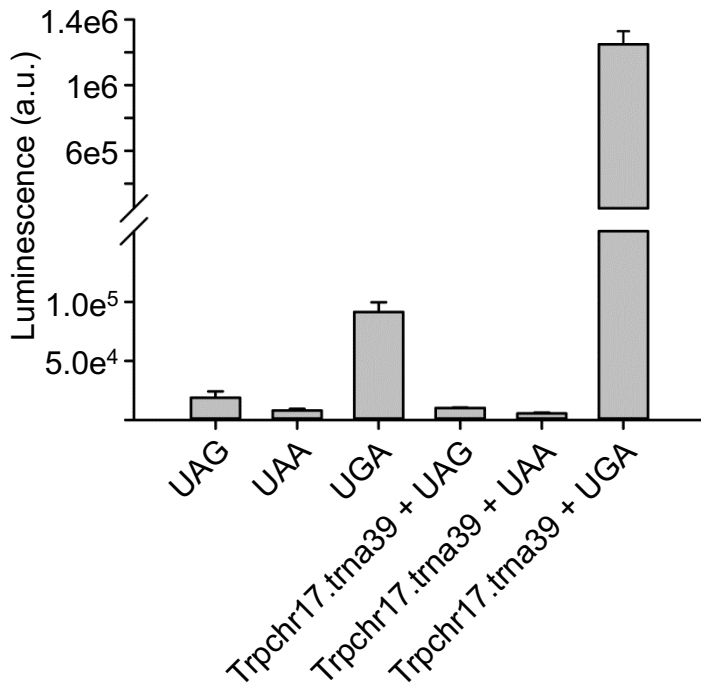

**Stop codon specificity is maintained for ACE-tRNA<sup>Trp</sup>.** Suppression activity for tRNA Trp<sup>TGA</sup> Trpchr17.tna39, the top performing Trp<sup>TGA</sup> suppressor tRNA, Figure 2. This tRNA was co-expressed with the indicated pNano-STOP plasmid.

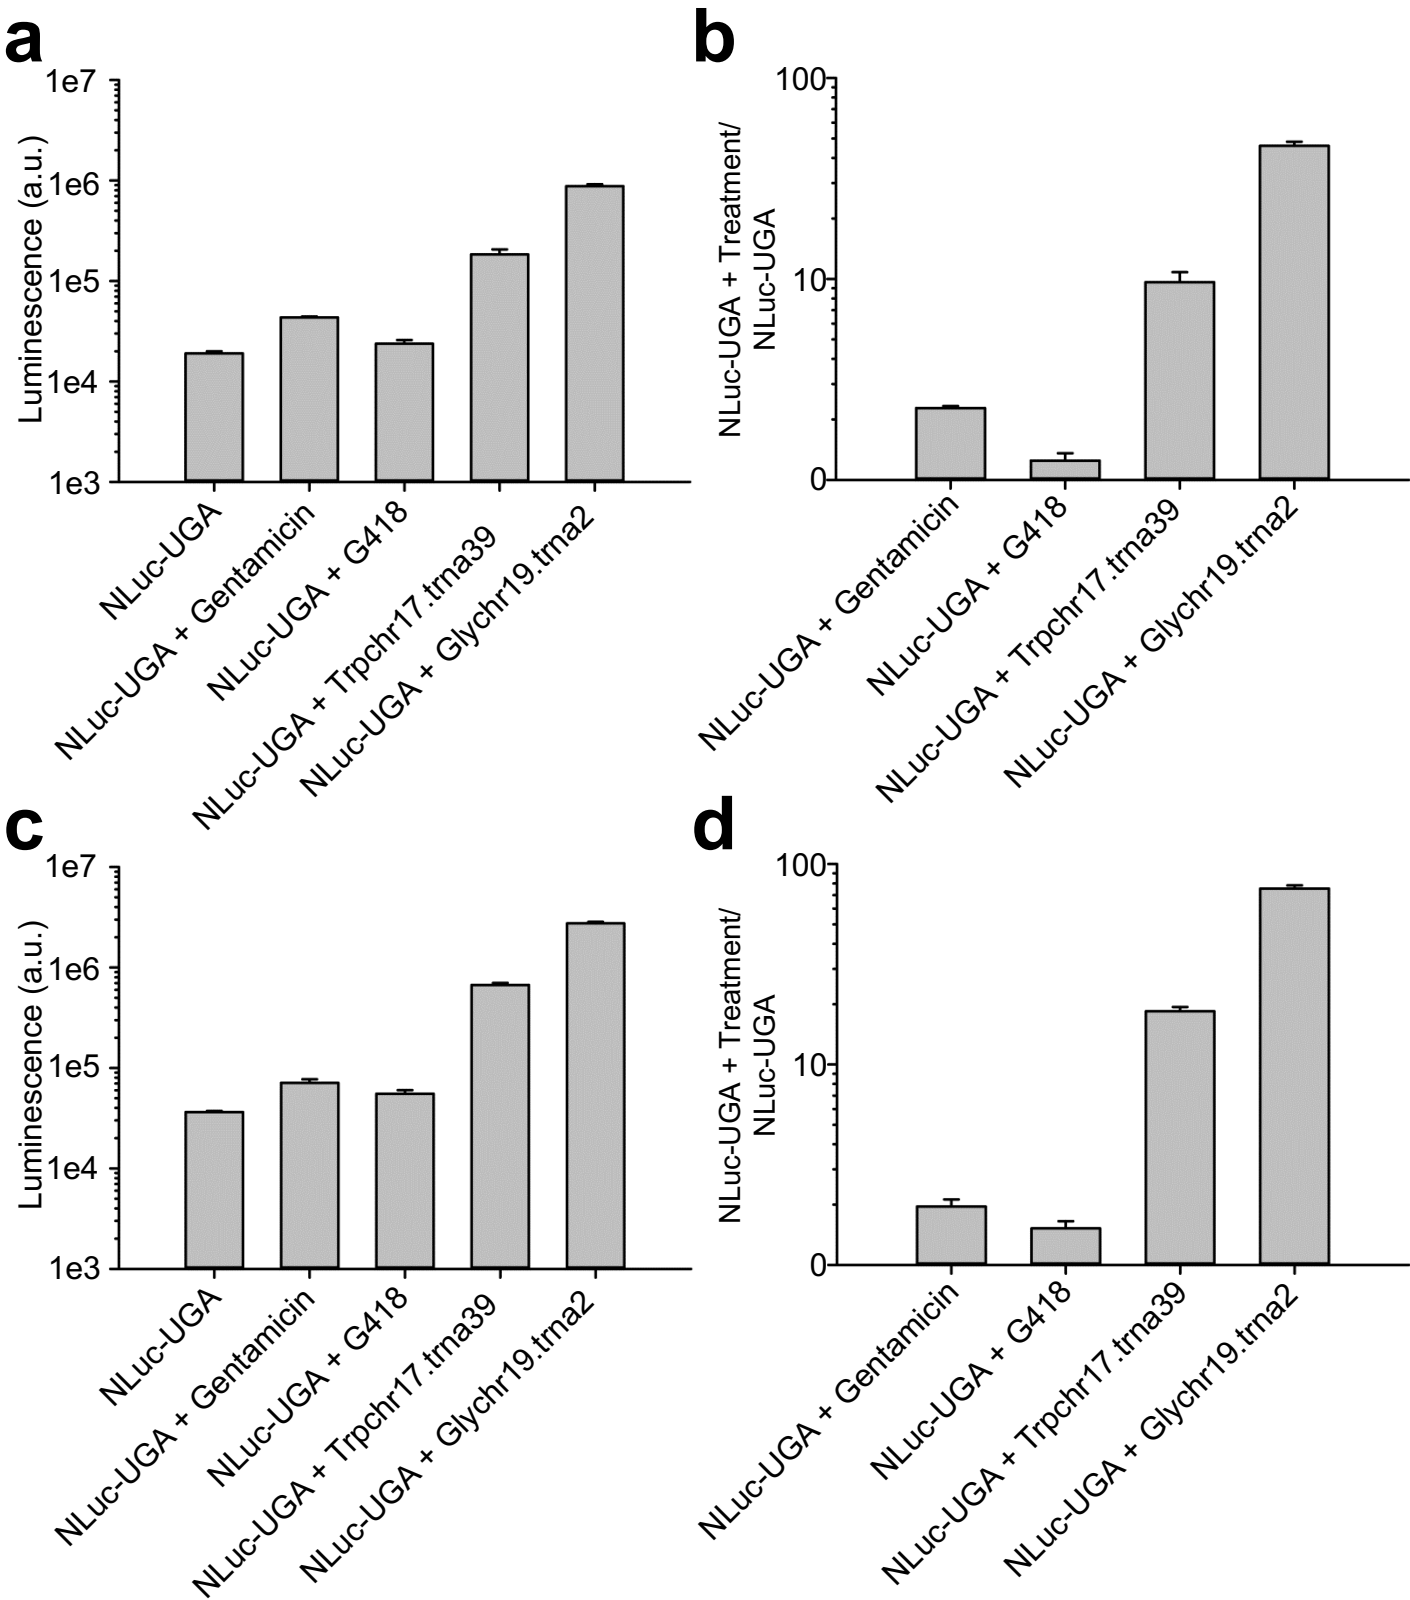

**ACE-tRNAs are more efficient than aminoglycoside PTC suppression.** **a)** Raw and **b)** normalized luminescence measured 24hrs following addition of gentamicin (40uM), G418 (150uM) and transfection with Trpchr17.trna39 and Glychr19.trna2 in HEK293 cells stably expressing PTC reporter NLuc-UGA. **c)** Raw and **d)** normalized luminescence measured 24hrs following addition of gentamicin (40uM), G418 (150uM) and co-transfection with Trpchr17.trna39 and Glychr19.trna2 in HEK293 cells.

Supplementary Fig. 8

WT CFTR  
Nontransfected  
G542tga CFTR  
G542tga CFTR + Glychr19.trna2  
Empty  
W1282tga CFTR  
W1282tga CFTR + Trpchr17.trna39

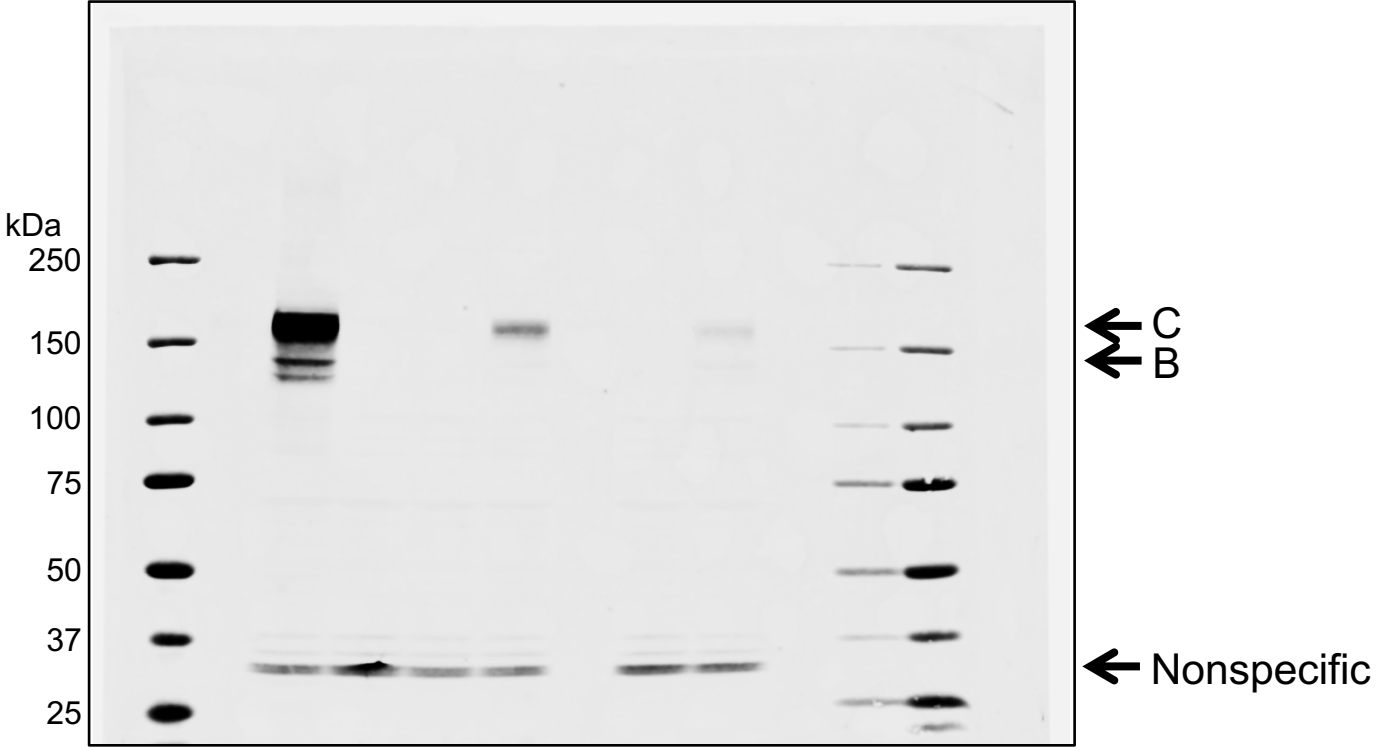

Full-length Western blot figure 5d.

WT CFTR  
Nontransfected  
G542tga CFTR  
G542tga CFTR + Glychr19.trna2  
Empty  
W1282tga CFTR  
W1282tga CFTR + Trpchr17.trna39

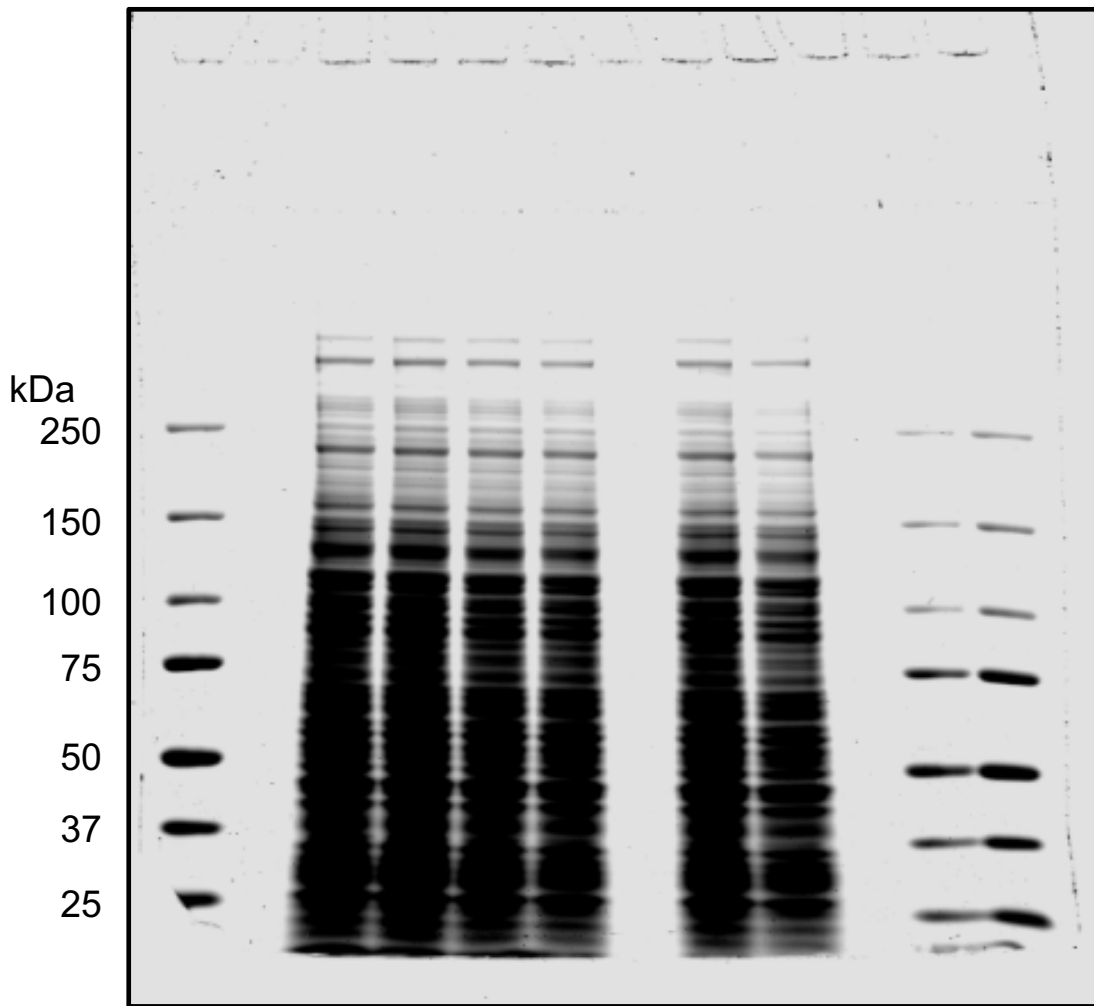

Coomassie Blue

Full-length Coomassie stain of replicate SDS-PAGE gel for figure 5d.

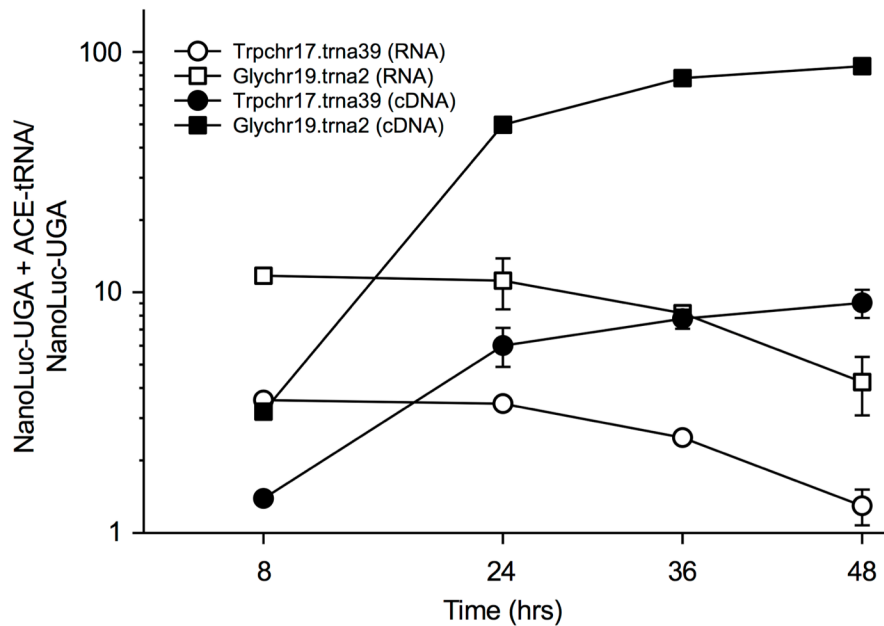

**Comparison of time courses of ACE-tRNA activity following delivery as RNA or cDNA.** ACE-tRNAs were delivered to HEK293 cells that stably express pNanoLuc-UGA as described in the methods, however only 5 $\mu$ l of the reaction mix was added to the cells to reduce the effect of transfection reagents on cell viability. ACE-tRNA delivered as RNA (open symbols), was more rapid in rescuing expression of the PTC reporter than cDNA constructs (closed circles). However, ACE-tRNA activity continued to rise over the 48 hrs when expressed from cDNA and decreased as a RNA deliverable.

**Supplementary Table 1. rRNA depletion oligos**

| <b>Reference</b> | <b>Sequence (5' to 3')</b>          |
|------------------|-------------------------------------|
| NR_003285        | TCCTCCCGGGGCTACGCCTGTCTGAGCGTCGCT   |
| NR_003286        | GGGGGATGCGTGCATTTATCAGATCA          |
|                  | TCCCCGCCCTTGCCTCTCGGCGCCC           |
|                  | TTGGTGACTCTAGATAACCTCGGGCCGATCGC    |
|                  | GAGCCGCCTGGATACCGCAGCTAGGAATAATGGA  |
| NR_003287        | TCGTGGGGGGCCCAAGTCCTTCTGATCGAGGCC   |
|                  | TCCGCCGAGGGCGCACCACCGGCCGTCTCGCC    |
|                  | GAGCCTCGGTTGGCCTCGGATAGCCGGTCCCCCGC |
|                  | GGGGCCGGGCCACCCCTCCCACGGCGCG        |
|                  | GCGCCCCGGGCGGGTCGCGCCGTGGGGCCCGG    |
|                  | CTCGCTTCTGGCGCCAAGCGCCCGGC          |
|                  | GCGCGCCGCGGCTGGACGAGGCGCCGCCGCC     |

Supplementary Table 2: Oligo Sequences (5'-3')

|                     |                                                                                     |
|---------------------|-------------------------------------------------------------------------------------|
|                     | pNanoLuc plasmid for High-throughput cloning and screening mutagenesis primers.     |
| pNanoLuc-For        | GCCACCATGGTATTTCACACTCGAAGATTTTCGTTG                                                |
| pNanoLuc- TGA-Rev   | TTACGCCAGAATGCGTTCGCACAGCCGCCAGCCGGTCACTCATCC                                       |
| pNanoLuc- TAA-Rev   | TTACGCCAGAATGCGTTCGCACAGCCGCCAGCCGGTCACTTATCC                                       |
| pNanoLuc- TAG-Rev   | TTACGCCAGAATGCGTTCGCACAGCCGCCAGCCGGTCACTTATCC                                       |
| pNanoLuc- WT-Rev    | TTACGCCAGAATGCGTTCGCACAGCCGCCAGCCGGTCACTCCACC                                       |
|                     | pNanoLuc plasmid for High-throughput cloning and screening Gibson assembly primers. |
| pNanoLuc-GAFor      | ctggctagcgtttaaacttaagcttGCCACCATGGTATTTCACAC                                       |
| pNanoLuc- TGA-GARev | actgtgctggatatctgcagaattcTTACGCCAGAATGCGTTC                                         |
| pNanoLuc- TAA-GARev | actgtgctggatatctgcagaattcCTACGCCAGAATGCGTTC                                         |
| pNanoLuc- TAG-GARev | actgtgctggatatctgcagaattcTTACGCCAGAATGCGTTC                                         |
| pNanoLuc- WT-GARev  | actgtgctggatatctgcagaattcTTACGCCAGAATGCGTTC                                         |
|                     | Primers for generation of 4 x ACE-tRNA expression Golden Gate puc57 plasmid         |
| tRNA 1F             | cacagacgaagactgttcctaatacgaactcactatagagcg                                          |
| tRNA 1R             | cacagacgaagactggtattaaattaaccctcactaaagcaaa                                         |
| tRNA 2F             | cacagacgaagacgtatacgaactcactatagagcg                                                |
| tRNA 2R             | cacagacgaagacggttcgtattaaattaaccctcactaaagcaaa                                      |
| tRNA 3F             | cacagacgaagacctacgaactcactatagagcgc                                                 |
| tRNA 3R             | cacagacgaagaccttaaccctcactaaagcaaaaa                                                |
| tRNA 4F             | cacagacgaagacacgttaatttaatacgaactcactatagagcg                                       |
| tRNA 4R             | cacagacgaagacaccctgaattaaccctcactaaagcaaa                                           |
|                     | Oligos for Golden Gate MCS in puc57 (EcoRI/HindIII)                                 |
| GoldenGateMCS-For   | aattcttcccagagacgTTCCAAGTCTTCatGAAGACTACAGGcgtctcccagga                             |
| GoldenGateMCS-Rev   | agcttcctgggagacgCCTGTAGTCTTCatGAAGACTTGGAacgtctcgggaag                              |
|                     | Primers for amplification SV40 polyA termination signal and Gibson Assembly         |
| SV40 term-For       | acagtggcggccgctcgagtTTGTTTATTGCAGTTATAATG                                           |
| SV40 term-Rev       | tggccgattcattaatgcagctgATAAGATACATTGATGAGTTTGG                                      |
|                     |                                                                                     |



Synthesized ccdB Golden Gate cDNA (digested plasmid with PciI and Gibson assembled cDNA)

tcttatcatgtctctggatcgaCTAGAGGGCCTTCCTAATACGACTCACTATAGAGCGCTCCGGTTTTCTG  
TGCTGAACCTCAGGGGACGCCGACACACGTACACGTCTAGTCTTCGCGGCCGCATTAGGCACCCAGGCT  
TTACACTTTTATGCTTCCGGCTCGTATAATGTGTGGATTTTGTAGTTAGGATCCGGCGAGATTTTCAGGAGC  
TAAGGAAGCTAAAATGGAGAAAAAATCACTGGATATACCACCGTTGATATATCCCAATGGCATCGTAAA  
GAACATTTTGAGGCATTTTCAGTCAGTTGCTCAATGTACCTATAACCAGACCGTTTCAGCTGGATATTACGG  
CCTTTTAAAGACCGTAAAGAAAAATAAGCACAAGTTTTATCCGGCCTTTATTACATTCTTGCCCGCCT  
GATGAATGCTCATCCGGAATTCCGTATGGCAATGAAAGACGGTGAGCTGGTGATATGGGATAGTGTTCAC  
CCTTGTACACCGTTTTCCATGAGCAAACGTTTTCATCGCTCTGGAGTGAATACCACGACGATT  
TCCGGCAGTTTCTACACATATATTCGCAAGATGTGGCGTGTACGGTGAAAACCTGGCCTATTTCCCTAA  
AGGGTTTATTGAGAATATGTTTTTCGTCTCAGCCAATCCCTGGGTGAGTTTACCAGTTTTGATTTAAAC  
GTGGCCAATATGGACAACCTTCTTCGCCCCGTTTTACCATGGGCAAATATTATACGCAAGGCGACAAGG  
TGCTGATGCCGCTGGCGATTTCAGGTTTCATCATGCCGTCTGTGATGGCTTCCATGTCGGCAGAATGCTTAA  
TGAATTACAACAGTACTGCGATGAGTGGCAGGGCGGGCGTAAAAGATCTGGATCCGGCTTACTAAAAGCC  
AGATAACAGTATGCGTATTTGCGCGCTGATTTTTGCGGTATAAGAATATATACTGATATGTATACCCGAA  
GTATGTCAAAAAGAGGTGTGCTATGAAGCAGCGTATTACAGTGACAGTTGACAGCGACAGCTATCAGTTG  
CTCAAGGCATATATGATGTCAATATCTCCGGTCTGGTAAGCACAACCATGCAGAAATGAAGCCCGTCGTCT  
GCGTGCCGAACGCTGGAAAGCGGAAAATCAGGAAGGGATGGCTGAGGTGCGCCCGTTTTATTGAAATGAAC  
GGCTCTTTTGTGACGAGAACAGGGACTGGTGAAATGCAGTTAAGGTTTACACCTATAAAAAGAGAGAGC  
CGTTATCGTCTGTTTGTGGATGTACAGAGTGATATTATTGACACGCCCGGGCGACGGATGGTGATCCCCC  
TGGCCAGTGCACGTCTGCTGTCAGATAAAGTCTCCCGTGAACCTTACCCGGTGGTGCATATCGGGGATGA  
AAGCTGGCGCATGATGACCACCGATATGGCCAGTGTCCGGTCTCCGTTATCGGGGAAGAAGTGGCTGAT  
CTCAGCCACCGGAAAATGACATCAAAAACGCCATTAACCTGATGTTCTGGGGAATATAAATGTCAGGCT  
CCGTTATACACAGCCAGTCTGCAGGGAgaagaccgGTCCTTTTTTTGCTTTAGTGAGGGTTAATTCAGT  
GAGCAAAAGGC

The following mutants gibbon assembled into the naturally occurring HindIII-EcoRI sites:

pNanoLuc-TGA

gccaccATGGTaTTCACACTCGAAGATTTTCGTTGGGGACTGGCGACAGACAGCCGGCTACAACC  
TGGACCAAGTCCTTGAACAGGGAGGTGTGTCCAGTTTGTTCAGAATCTCGGGGTGTCCGTAAC  
TCCGATCCAAAGGATTGTCCTGAGCGGTGAAAATGGGCTGAAGATCGACATCCATGTCATCATC  
CCGTATGAAGGTCTGAGCGGCGACCAAATGGGCCAGATCGAAAAAATTTTTAAGGTGGTGTACC  
CTGTGGATGATCATCACTTTAAGGTGATCCTGCACTATGGCACACTGGTAATCGACGGGGTTAC  
GCCGAACATGATCGACTATTTTCGGACGGCCGTATGAAGGCATCGCCGTGTTTCGACGGCAAAAAG  
ATCACTGTAACAGGGACCTGTGGAACGGCAACAAAATTATCGACGAGCGCCTGATCAACCCCG  
ACGGCTCCCTGCTGTTCCGAGTAACCATCAACGGATGAG**TGA**CCGGCTGGCGGCTGTGCGAACG  
CATTCTGGCGTAA

pNanoLuc-TAA

gccaccATGGTaTTCACACTCGAAGATTTTCGTTGGGGACTGGCGACAGACAGCCGGCTACAACC  
TGGACCAAGTCCTTGAACAGGGAGGTGTGTCCAGTTTGTTCAGAATCTCGGGGTGTCCGTAAC  
TCCGATCCAAAGGATTGTCCTGAGCGGTGAAAATGGGCTGAAGATCGACATCCATGTCATCATC  
CCGTATGAAGGTCTGAGCGGCGACCAAATGGGCCAGATCGAAAAAATTTTTAAGGTGGTGTACC  
CTGTGGATGATCATCACTTTAAGGTGATCCTGCACTATGGCACACTGGTAATCGACGGGGTTAC  
GCCGAACATGATCGACTATTTTCGGACGGCCGTATGAAGGCATCGCCGTGTTTCGACGGCAAAAAG

ATCACTGTAACAGGGACCCTGTGGAACGGCAACAAAATTATCGACGAGCGCCTGATCAACCCCG  
ACGGCTCCCTGCTGTTCCGAGTAACCATCAACGGATGAG**TAA**CCGGCTGGCGGCTGTGCGAACG  
CATTCTGGCGTAG

### pNanoLuc-TAG

gccaccATGGTaTTCACACTCGAAGATTTTCGTTGGGGACTGGCGACAGACAGCCGGCTACAACC  
TGGACCAAGTCCCTTGAACAGGGAGGTGTGTCCAGTTTGTTCAGAAATCTCGGGGTGTCCGTAAAC  
TCCGATCCAAAGGATTGTCCTGAGCGGTGAAAATGGGCTGAAGATCGACATCCATGTCATCATC  
CCGTATGAAGGTCTGAGCGGCGACCAAATGGGCCAGATCGAAAAAATTTTTAAGGTGGTGTACC  
CTGTGGATGATCATCACTTTAAGGTGATCCTGCACTATGGCACACTGGTAATCGACGGGGTTAC  
GCCGAACATGATCGACTATTTTCGGACGGCCGTATGAAGGCATCGCCGTGTTTCGACGGCAAAAAG  
ATCACTGTAACAGGGACCCTGTGGAACGGCAACAAAATTATCGACGAGCGCCTGATCAACCCCG  
ACGGCTCCCTGCTGTTCCGAGTAACCATCAACGGATGAG**TAG**CCGGCTGGCGGCTGTGCGAACG  
CATTCTGGCGTAA

### pNanoLuc-WT

gccaccATGGTaTTCACACTCGAAGATTTTCGTTGGGGACTGGCGACAGACAGCCGGCTACAACC  
TGGACCAAGTCCCTTGAACAGGGAGGTGTGTCCAGTTTGTTCAGAAATCTCGGGGTGTCCGTAAAC  
TCCGATCCAAAGGATTGTCCTGAGCGGTGAAAATGGGCTGAAGATCGACATCCATGTCATCATC  
CCGTATGAAGGTCTGAGCGGCGACCAAATGGGCCAGATCGAAAAAATTTTTAAGGTGGTGTACC  
CTGTGGATGATCATCACTTTAAGGTGATCCTGCACTATGGCACACTGGTAATCGACGGGGTTAC  
GCCGAACATGATCGACTATTTTCGGACGGCCGTATGAAGGCATCGCCGTGTTTCGACGGCAAAAAG  
ATCACTGTAACAGGGACCCTGTGGAACGGCAACAAAATTATCGACGAGCGCCTGATCAACCCCG  
ACGGCTCCCTGCTGTTCCGAGTAACCATCAACGGATGAG**TGG**CCGGCTGGCGGCTGTGCGAACG  
CATTCTGGCGTAA

### HDH-TGA-HIS-STREP

ATGTCATTCAATACTATAATCGACTGGAACAGCTGCACTGCTGAGCAGCAAAGACAGCTGTTGATGAGAC  
CAGCGATTTCCCGCTCCGAAAGTATCACAAGAACGGTGAATGATATACTTGATAACGTGAAAGCCAGAGG  
CGACGAGGCGCTTCGAGAGTACAGCGCTAAATTTGACAAAACCTACCGTAACGGCACTTAAAGTCTCTGCT  
GAAGAAATCGCAGCCGCCAGCGAGCGGCTTTCTGACGAACTCAAGCAGGCGATGGCCGTTGCTGTAAAAT  
**GATA**TCGAACTTTCCACACCCGCTCAAAAATTGCCCTCCGGTTGATGTAGAAACACAACCCGGAGTCCGCT  
GCCAGCAAGTTACCCGGCCTGTAGCCTCAGTCGGATTGTATATTCCGGGTGGATCTGCGCCTCTGTTTCAG  
CACAGTCCCTCATGCTGGCGACGCCCGCATCTATCGCTGGATGTAAGAAAGTCGTATTGTGTTCTCCTCCC  
CCTATTGCAGATGAAATATTGTACGCCGCCAACTGTGTGGTGTCCAAGACGTATCAATGTGGGAGGCG  
CTCAGGCTATAGCTGCTTTGGCATTGGCACAGAGTCTGTCCCCAAGGTCGACAAGATCTTCGGTCCAGG  
AAATGCGTTTTGCTCACTGAGGCAAAAAGACAGGTCTCACAGAGACTGGATGGGGCAGCCATCGACATGCCG  
GCTGGCCCATCAGAAGTACTGGTGATTGCTGACAGTGGAGCTACCCCGGACTTCGTCGCCTCCGACCTCC  
TGTCCTCAAGCTGAGCATGGTCCAGATAGTCAGGTTATCCTGCTTACCCCGCGGCTGATATGGCCAGGCG  
CGTCGCAGAAGCGGTTGAGCGCCAACGGCGGAACTCCCGGGGCGGAGACTGCAAGGCAAGCTCTTAAC  
GCGTCCAGGCTGATTGTAACAAAAGATCTGGCCCAATGTGTAGAAATCTCAAACCAGTACGGACCAGAGC  
ACTTGATCATAACAGACGCGAAACGCTCGGGAGCTTGTGACAGTATCACTTCAGCGGGGTCTGTTTTTCT  
TGGGGATTGGTCTCCAGAATCCCGGGCGATTACGCATCCGGCACAAACCATGTTCTTCTACATACGGC  
TATACTGCCACTTGTCTAGTCTTGGGCTTGCCGACTTCAGAAGCGCATGACCGTTCAAGAAGTGTCCA  
AAGAAGGATTTTCAGCGCTTGTCTTACAATAGAAACGCTCGCCGAGCTGAGAGACTCACTGCCATAA  
GAACGCAGTAACACTGCGCGTCAACGCTCTCAAGGAGCAGGCGcaccaccatcaccatcatcacTCC  
GGGGCAGTGCATGGTCACACCCTCAGTTTGAGAAGTAA

## Genbank sequence for pNanoLuc-TGA-pcDNA3.1

pNanoLuc-TGA-pcDNA3.1

LOCUS NanLuc\_pcDNA3.1\_BbsI\_le 5025 bp ds-DNA circular 8-  
DEC-2018

DEFINITION .

FEATURES Location/Qualifiers

|              |                           |
|--------------|---------------------------|
| misc_feature | 3140..3163                |
|              | /label=""                 |
|              | /ApEinfo_revcolor=#faac61 |
|              | /ApEinfo_fwdcolor=#faac61 |
| variation    | 3176..3187                |
|              | /label="3' term signal"   |
|              | /ApEinfo_revcolor=#c7b0e3 |
|              | /ApEinfo_fwdcolor=#c7b0e3 |
| rep_origin   | complement(3255..3874)    |
|              | /label="pBR322_origin"    |
|              | /ApEinfo_revcolor=#d6b295 |
|              | /ApEinfo_fwdcolor=#d6b295 |
| gene         | complement(4029..4889)    |
|              | /label="Ampicillin"       |
|              | /ApEinfo_revcolor=#b4abac |
|              | /ApEinfo_fwdcolor=#b4abac |
| promoter     | 1739..1762                |
|              | /label="lac_promoter"     |
|              | /ApEinfo_revcolor=#f58a5e |
|              | /ApEinfo_fwdcolor=#f58a5e |
| CDS          | complement(4029..4889)    |
|              | /label="ORF frame 2"      |
|              | /ApEinfo_revcolor=#c7b0e3 |
|              | /ApEinfo_fwdcolor=#c7b0e3 |

promoter complement(4931..4959)  
 /label="AmpR\_promoter"  
 /ApEinfo\_revcolor=#f8d3a9  
 /ApEinfo\_fwdcolor=#f8d3a9

promoter 863..881  
 /label="T7\_promoter"  
 /ApEinfo\_revcolor=#c6c9d1  
 /ApEinfo\_fwdcolor=#c6c9d1

promoter 236..852  
 /label="CMV\_imnearly\_promoter"  
 /ApEinfo\_revcolor=#b1ff67  
 /ApEinfo\_fwdcolor=#b1ff67

variation 1634..1706  
 /label="5' human Tyr-tRNA leader"  
 /ApEinfo\_revcolor=#d59687  
 /ApEinfo\_fwdcolor=#d59687

tRNA 3176..3187  
 /label="tRNA tyr"  
 /ApEinfo\_revcolor=#b7e6d7  
 /ApEinfo\_fwdcolor=#b7e6d7

tRNA 1652..1706  
 /label="tRNA tyr"  
 /ApEinfo\_revcolor=#85dae9  
 /ApEinfo\_fwdcolor=#85dae9

CDS 1823..2482  
 /label="ORF frame 1"  
 /ApEinfo\_revcolor=#d6b295  
 /ApEinfo\_fwdcolor=#d6b295

misc\_feature 315..602  
 /label="CAG\_enhancer"

```

                /ApEinfo_revcolor=#b7e6d7
                /ApEinfo_fwdcolor=#b7e6d7
misc_feature 2824..3129
                /label="ccdB"
                /ApEinfo_revcolor=#b4abac
                /ApEinfo_fwdcolor=#b4abac
misc_feature 1407..3701
                /label=""
                /ApEinfo_revcolor=#ff9ccd
                /ApEinfo_fwdcolor=#ff9ccd
misc_feature 769..789
                /label="CMV_fwd_primer"
                /ApEinfo_revcolor=#75c6a9
                /ApEinfo_fwdcolor=#75c6a9
misc_feature 1715..1732
                /label=""
                /ApEinfo_revcolor=#faac61
                /ApEinfo_fwdcolor=#faac61
exon 917..1441
                /label="nanluc"
                /ApEinfo_revcolor=#c7b0e3
                /ApEinfo_fwdcolor=#c7b0e3
source 1..5025
                /label="Zeo (+) "
                /ApEinfo_revcolor=#ffef86
                /ApEinfo_fwdcolor=#ffef86
gene 1823..2482
                /label="CAT/CamR"
                /ApEinfo_revcolor=#b7e6d7
                /ApEinfo_fwdcolor=#b7e6d7

```

polyA\_signal 1476..1619  
/label=""  
/ApEinfo\_revcolor=#d59687  
/ApEinfo\_fwddcolor=#d59687

ORIGIN

1 GACGGATCGG GAGATCTCCC GATCCCCTAT GGTCGACTCT CAGTACAATC  
TGCTCTGATG

61 CCGCATAGTT AAGCCAGTAT CTGCTCCCTG CTTGTGTGTT GGAGGTCGCT  
GAGTAGTGCG

121 CGAGCAAAT TTAAGCTACA ACAAGGCAAG GCTTGACCGA CAATTGCATG  
AAGAATCTGC

181 TTAGGGTTAG GCGTTTTGCG CTGCTTCGCG ATGTACGGGC CAGATATACG  
CGTTGACATT

241 GATTATTGAC TAGTTATTAA TAGTAATCAA TTACGGGGTC ATTAGTTCAT  
AGCCCATATA

301 TGGAGTTCCG CGTTACATAA CTTACGGTAA ATGGCCCGCC TGGCTGACCG  
CCCAACGACC

361 CCCGCCATT GACGTCAATA ATGACGTATG TTCCCATAGT AACGCCAATA  
GGGACTTTCC

421 ATTGACGTCA ATGGGTGGAC TATTTACGGT AAAGTCCCCA CTTGGCAGTA  
CATCAAGTGT

481 ATCATATGCC AAGTACGCCC CCTATTGACG TCAATGACGG TAAATGGCCC  
GCCTGGCATT

541 ATGCCCAGTA CATGACCTTA TGGGACTTTC CTAATTGGCA GTACATCTAC  
GTATTAGTCA

601 TCGCTATTAC CATGGTGATG CGGTTTTGGC AGTACATCAA TGGGCGTGGA  
TAGCGGTTTG

661 ACTCACGGGG ATTTCCAAGT CTCCACCCCA TTGACGTCAA TGGGAGTTTG  
TTTTGGCACC

721 AAAATCAACG GGACTTTCCA AAATGTCGTA ACAACTCCGC CCCATTGACG  
CAAATGGGCG

781 GTAGGCGTGT ACGGTGGGAG GTCTATATAA GCAGAGCTCT CTGGCTAACT  
AGAGAACCCA

841 CTGCTTACTG GCTTATCGAA ATTAATACGA CTCACTATAG GGAGACCCAA  
GCTGGCTAGC

901 GTTTAAACTT AAGCTTgcca ccATGGTaTT CACACTCGAA GATTTTCGTTG  
GGGACTGGCG

961 ACAGACAGCC GGCTACAACC TGGACCAAGT CCTTGAACAG GGAGGTGTGT  
CCAGTTTGT

1021 TCAGAATCTC GGGGTGTCCG TAACTCCGAT CCAAAGGATT GTCCTGAGCG  
GTGAAAATGG

1081 GCTGAAGATC GACATCCATG TCATCATCCC GTATGAAGGT CTGAGCGGCG  
ACCAAATGGG

1141 CCAGATCGAA AAAATTTTTTA AGGTGGTGTA CCCTGTGGAT GATCATCACT  
TTAAGGTGAT

1201 CCTGCACTAT GGCACACTGG TAATCGACGG GGTTACGCCG AACATGATCG  
ACTATTTTCGG

1261 ACGGCCGTAT GAAGGCATCG CCGTGTTCTGA CGGCAAAAAG ATCACTGTAA  
CAGGGACCCT

1321 GTGGAACGGC AACAAAATTA TCGACGAGCG CCTGATCAAC CCCGACGGCT  
CCCTGCTGTT

1381 CCGAGTAACC ATCAACGGAT GAGTGACCGG CTGGCGGCTG TCGAACGCA  
TTCTGGCGTA

1441 AGAATTCTGC AGATATCCAG CACAGTGGCG GCCGctcgag TCTAGATTGT  
TTATTGCAGC

1501 TTATAATGGT TACAAATAAA GCAATAGCAT CACAAATTTT CAAATAAAG  
CATTTTTTTT

1561 ACTGCATTCT AGTTGTGGTT TGTCCAAACT CATCAATGTA TCTTATCATG  
TCTGGATCgC

1621 TAGAGGGCCT TCCTAATACG ACTCACTATA GAGCGCTCCG GTTTTTCTGT  
GCTGAACCTC

1681 AGGGGACGCC GACACACGTA CACGTCTAGT CTTCGCGGCC GCATTAGGCA  
CCCCAGGCTT

1741 TACACTTTAT GCTTCCGGCT CGTATAATGT GTGGATTTTG AGTTAGGATC  
CGGCGAGATT

1801 TTCAGGAGCT AAGGAAGCTA AAATGGAGAA AAAAATCACT GGATATACCA  
CCGTTGATAT

1861 ATCCCAATGG CATCGTAAAG AACATTTTGA GGCATTTT CAGTTGCTC  
AATGTACCTA

1921 TAACCAGACC GTTCAGCTGG ATATTACGGC CTTTTTAAAG ACCGTAAAGA  
AAAATAAGCA

1981 CAAGTTTTAT CCGGCCTTTA TTCACATTCT TGCCCGCCTG ATGAATGCTC  
ATCCGGAATT

2041 CCGTATGGCA ATGAAAGACG GTGAGCTGGT GATATGGGAT AGTGTTACCC  
CTTGTTACAC

2101 CGTTTTCCAT GAGCAAACCTG AACGTTTTTC ATCGCTCTGG AGTGAATACC  
ACGACGATTT

2161 CCGGCAGTTT CTACACATAT ATTCGCAAGA TGTGGCGTGT TACGGTGAAA  
ACCTGGCCTA

2221 TTTCCCTAAA GGGTTTATTG AGAATATGTT TTTCGTCTCA GCCAATCCCT  
GGGTGAGTTT

2281 CACCAGTTTT GATTTAAACG TGGCCAATAT GGACAACCTC TTCGCCCCCG  
TTTTACCCAT

2341 GGGCAAATAT TATACGCAAG GCGACAAGGT GCTGATGCCG CTGGCGATTC  
AGGTTTCATCA

2401 TGCCGTCTGT GATGGCTTCC ATGTCGGCAG AATGCTTAAT GAATTACAAC  
AGTACTGCGA

2461 TGAGTGGCAG GCGGGGCGT AAAGATCTGG ATCCGGCTTA CTAAAAGCCA  
GATAACAGTA

2521 TGCGTATTTG CGCGCTGATT TTTGCGGTAT AAGAATATAT ACTGATATGT  
ATACCCGAAG

2581 TATGTCAAAA AGAGGTGTGC TATGAAGCAG CGTATTACAG TGACAGTTGA  
CAGCGACAGC

2641 TATCAGTTGC TCAAGGCATA TATGATGTCA ATATCTCCGG TCTGGTAAGC  
ACAACCATGC

2701 AGAATGAAGC CCGTCGTCTG CGTGCCGAAC GCTGGAAAGC GGAAAATCAG  
GAAGGGATGG

2761 CTGAGGTTCG CCGTTTTATT GAAATGAACG GCTCTTTTGC TGACGAGAAC  
AGGGACTGGT

2821 GAAATGCAGT TTAAGGTTTA CACCTATAAA AGAGAGAGCC GTTATCGTCT  
GTTTGTGGAT

2881 GTACAGAGTG ATATTATTGA CACGCCCCGG CGACGGATGG TGATCCCCCT  
GGCCAGTGCA

2941 CGTCTGCTGT CAGATAAAGT CTCCCGTGAA CTTTACCCGG TGGTGCATAT  
CGGGGATGAA

3001 AGCTGGCGCA TGATGACCAC CGATATGGCC AGTGTGCCGG TCTCCGTTAT  
CGGGGAAGAA



3061 GTGGCTGATC TCAGCCACCG CGAAAATGAC ATCAAAAACG CCATTAACCT  
GATGTTCTGG

3121 GGAATATAAA TGTCAGGCTC CGTTATACAC AGCCAGTCTG CAGGGAAgaa  
gaccgGTCCT

3181 TTTTTTGCTT TAGTGAGGGT TAATTCAGGC ATGTGAGCAA AAGGCCAGCA  
AAAGGCCAGG

3241 AACCGTAAAA AGGCCGCGTT GCTGGCGTTT TTCCATAGGC TCCGCCCCC  
TGACGAGCAT

3301 CACAAAAATC GACGCTCAAG TCAGAGGTGG CGAAACCCGA CAGGACTATA  
AAGATACCAG

3361 GCGTTTCCCC CTGGAAGCTC CCTCGTGCGC TCTCCTGTTC CGACCCTGCC  
GCTTACCGGA

3421 TACCTGTCCG CCTTTCTCCC TTCGGGAAGC GTGGCGCTTT CTCAATGCTC  
ACGCTGTAGG

3481 TATCTCAGTT CGGTGTAGGT CGTTCGCTCC AAGCTGGGCT GTGTGCACGA  
ACCCCCGTT

3541 CAGCCCGACC GCTGCGCCTT ATCCGGTAAC TATCGTCTTG AGTCCAACCC  
GGTAAGACAC

3601 GACTTATCGC CACTGGCAGC AGCCACTGGT AACAGGATTA GCAGAGCGAG  
GTATGTAGGC

3661 GGTGCTACAG AGTTCTTGAA GTGGTGGCCT AACTACGGCT AACTAGAAG  
GACAGTATTT

3721 GGTATCTGCG CTCTGCTGAA GCCAGTTACC TTCGGAAAAA GAGTTGGTAG  
CTCTTGATCC

3781 GGCAAACAAA CCACCGCTGG TAGCGGTGGT TTTTTTGTTT GCAAGCAGCA  
GATTACGCGC

3841 AGAAAAAAG GATCTCAAGA AGATCCTTTG ATCTTTTCTA CGGGGTCTGA  
CGCTCAGTGG

3901 AACGAAAAC CACGTTAAGG GATTTTGGTC ATGAGATTAT CAAAAGGAT  
CTTCACCTAG

3961 ATCCTTTTAA ATTAAAAATG AAGTTTTAAA TCAATCTAAA GTATATATGA  
GTAAACTTGG

4021 TCTGACAGTT ACCAATGCTT AATCAGTGAG GCACCTATCT CAGCGATCTG  
TCTATTTTCGT

4081 TCATCCATAG TTGCCTGACT CCCCCTCGTG TAGATAACTA CGATACGGGA  
GGGCTTACCA

4141 TCTGGCCCCA GTGCTGCAAT GATACCGCGA GACCCACGCT CACCGGCTCC  
AGATTTATCA

4201 GCAATAAACCC AGCCAGCCGG AAGGGCCGAG CGCAGAAGTG GTCCTGCAAC  
TTTATCCGCC

4261 TCCATCCAGT CTATTAATTG TTGCCGGGAA GCTAGAGTAA GTAGTTCGCC  
AGTTAATAGT

4321 TTGCGCAACG TTGTTGCCAT TGCTACAGGC ATCGTGGTGT CACGCTCGTC  
GTTTGGTATG

4381 GCTTCATTCA GCTCCGGTTC CCAACGATCA AGGCGAGTTA CATGATCCCC  
CATGTTGTGC

4441 AAAAAAGCGG TTAGCTCCTT CGGTCCTCCG ATCGTTGTCA GAAGTAAGTT  
GGCCGCAGTG

4501 TTATCACTCA TGGTTATGGC AGCACTGCAT AATTCTCTTA CTGTCATGCC  
ATCCGTAAGA

4561 TGCTTTTCTG TGACTIONGTA GTACTCAACC AAGTCATTCT GAGAATAGTG  
TATGCGGCGA

4621 CCGAGTTGCT CTTGCCCGGC GTCAATACGG GATAATACCG CGCCACATAG  
CAGAACTTTA

4681 AAAGTGCTCA TCATTGAAA ACGTTCTTCG GGGCGAAAAC TCTCAAGGAT  
CTTACCGCTG

4741 TTGAGATCCA GTTCGATGTA ACCCACTCGT GCACCCAACT GATCTTCAGC  
ATCTTTTACT

4801 TTCACCAGCG TTTCTGGGTG AGCAAAAACA GGAAGGCAAA ATGCCGCAAA  
AAAGGGAATA

4861 AGGGCGACAC GGAAATGTTG AATACTCATA CTCTTCCTTT TTCAATATTA  
TTGAAGCATT

4921 TATCAGGGTT ATTGTCTCAT GAGCGGATAC ATATTTGAAT GTATTTAGAA  
AAATAAACAA

4981 ATAGGGGTTC CGCGCACATT TCCCCGAAAA GTGCCACCTG ACGTC

//
